# Supplementary material
Source: HighWire-hosted journal article supplement (https://rapm.bmj.com/highwire/filestream/14956/field_highwire_adjunct_files/8/rapm-2021-102560supp009_data_supplement.pdf)
Supplement: rapm-2021-102560supp009_data_supplement.pdf [file rapm-2021-102560supp009_data_supplement.pdf]

## Diaphragmatic US Assessment

### Dome movement

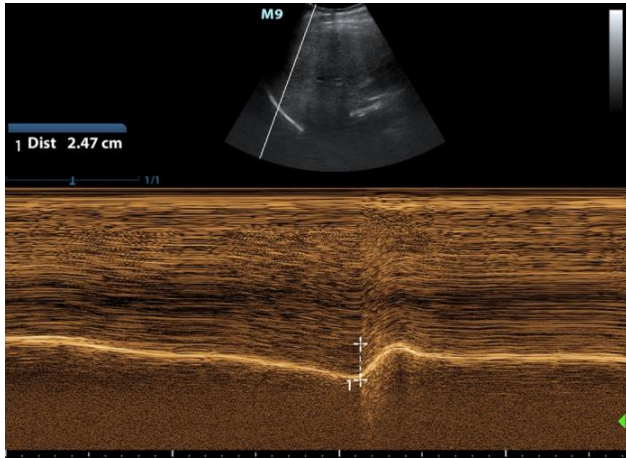

Quiet breathing > 1.6 cm

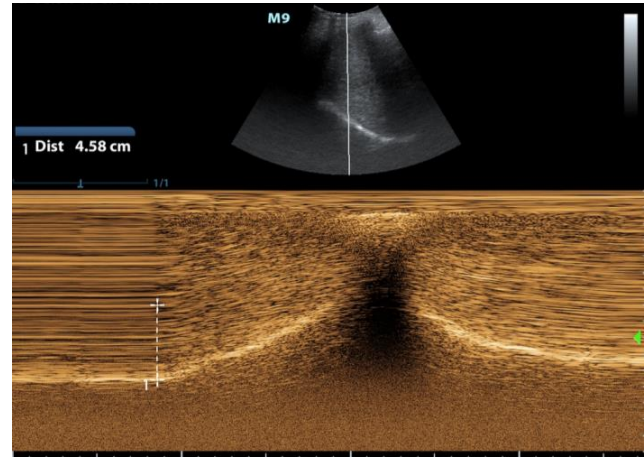

Deep breathing > 4.4 cm

### Diaphragm Thickness ( $\Delta tdi$ )

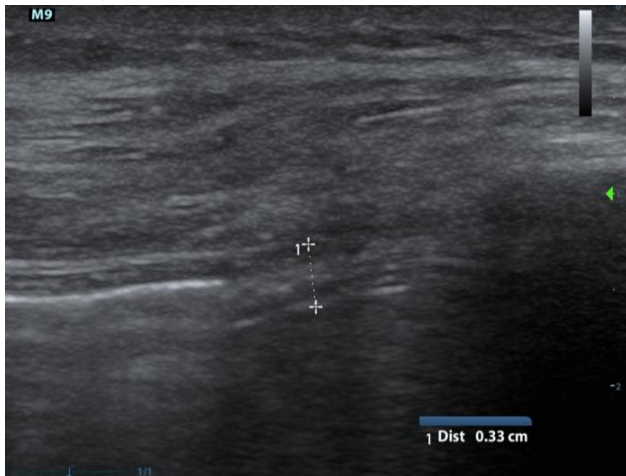

End inspiration

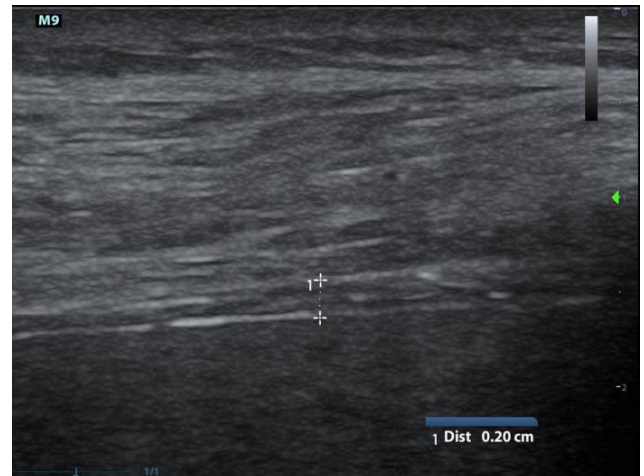

End exhalation

$$\Delta tdi = \frac{tdi \text{ end insp} - tdi \text{ end exhal}}{tdi \text{ end exhal}}$$

Normal > 20%
